# Supplementary material for: T Cell-Activating Mesenchymal Stem Cells as a Biotherapeutic for HCC
Source: PubMed Central journal article supplement — Mol Ther Oncolytics. 2017 Jul 28;6:69–79. doi: 10.1016/j.omto.2017.07.002 (PMC5562179; doi:10.1016/j.omto.2017.07.002), 2017-07-28
Supplement: mmc1.pdf [file mmc1.pdf]

**OMTO, Volume 6**

**Supplemental Information**

**T Cell-Activating Mesenchymal Stem Cells  
as a Biotherapeutic for HCC**

**Arpad Szoor, Abishek Vaidya, Mireya Paulina Velasquez, Zhuyong Mei, Daniel L. Galvan, David Torres, Adrian Gee, Andras Heczey, and Stephen Gottschalk**

**A**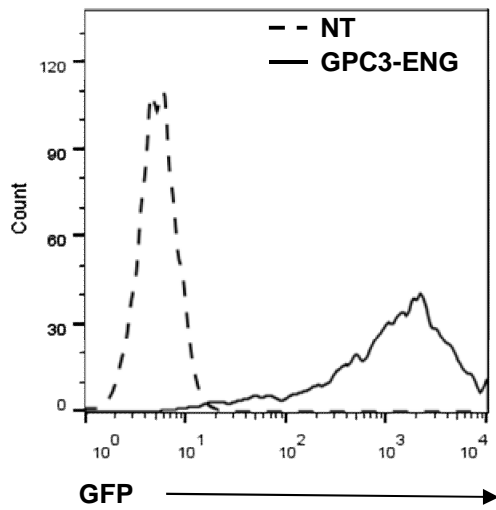**B**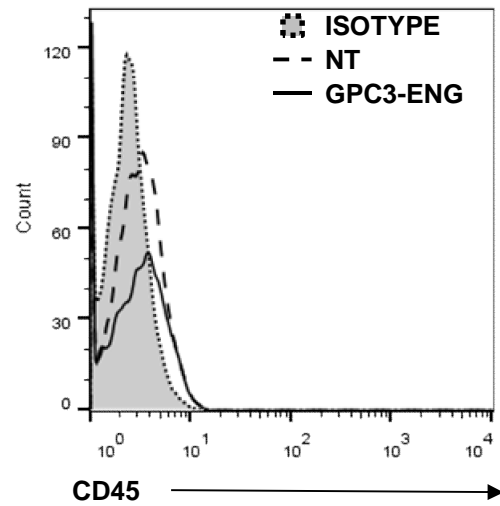**C**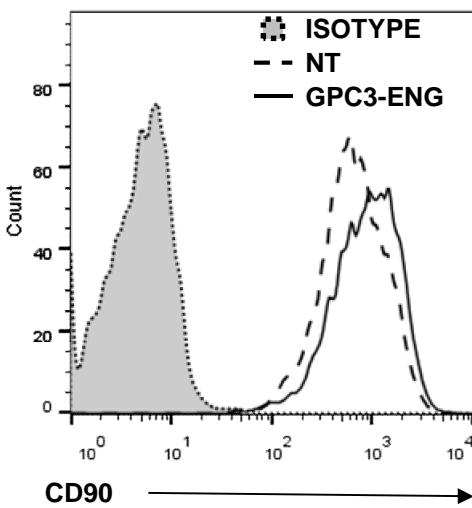**D**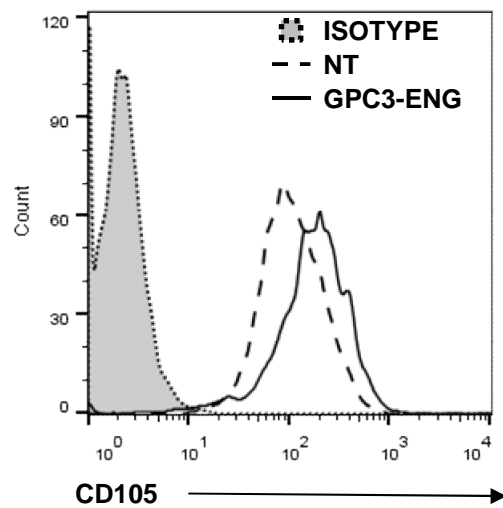

**Supplementary Figure 1: Phenotypic analysis of GPC3-ENG MSCs.** Representative FACS diagram of (a) GFP, (b) CD45, (c) CD90 and (d) CD105 expression of GPC3-ENG and NT MSCs.

**A**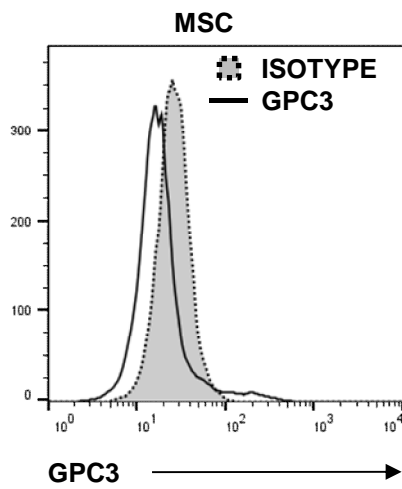**B**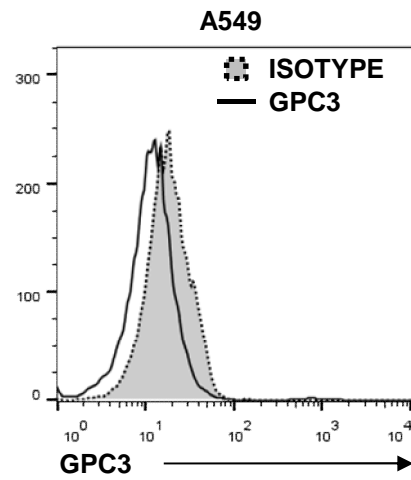**C**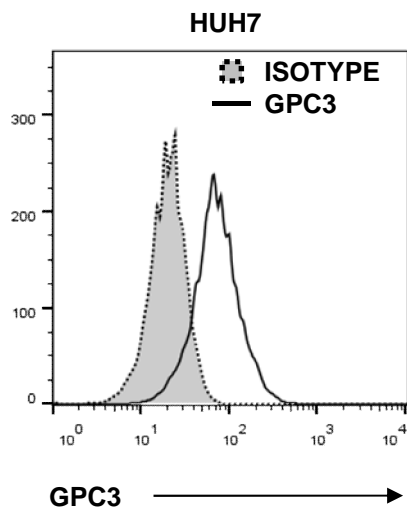**D**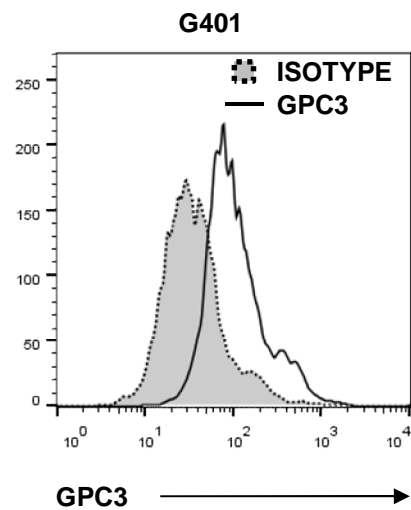

**Supplementary Figure 2: GPC3 expression of MSCs and tumor cell lines.** Representative FACS diagram of GPC3 expression of (a) MSC, (b) A549, (c) HUH7 and (d) G401 cells.

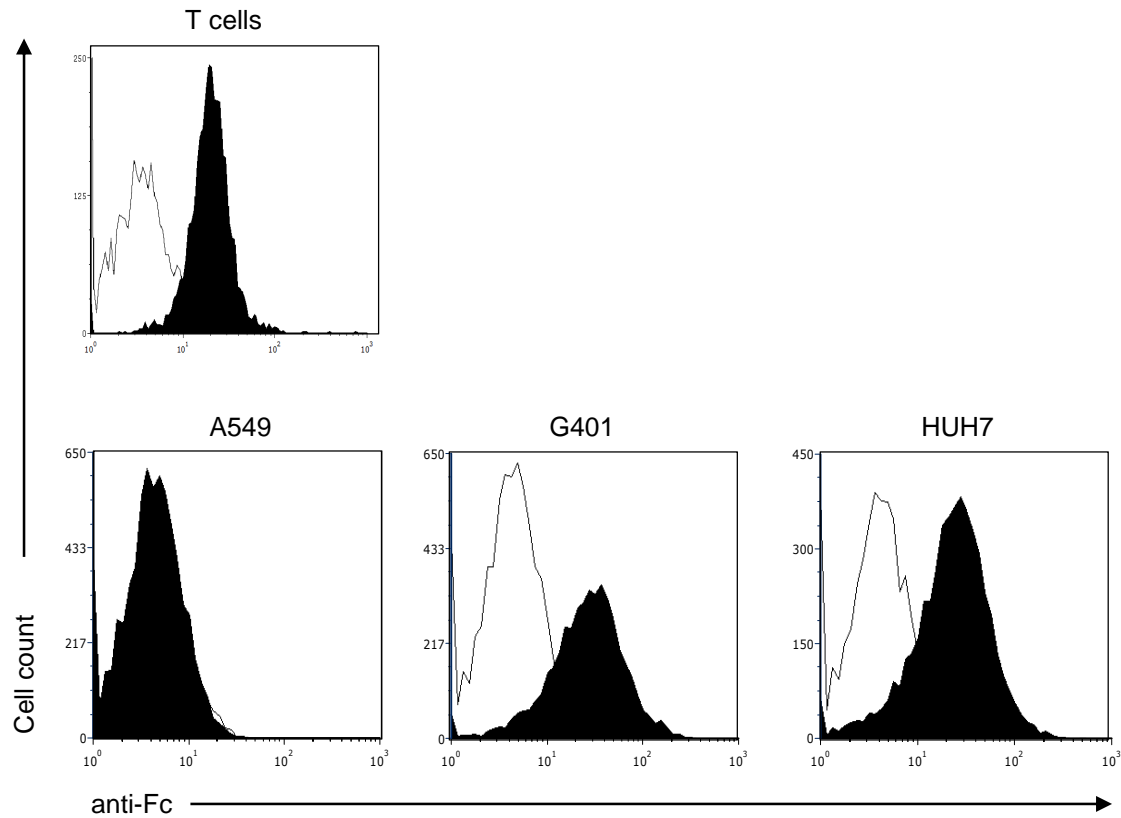

**Supplementary Figure 3: Target specific binding of GPC3-ENGs.** T cells and GPC3-positive (G401; HUH7) or negative (A549) target cells were incubated with supernatant from GPC3-ENG or non-transduced (NT) MSCs. After 24 hours cells were then washed, and incubated with recombinant GPC3-Fc (R&D Systems; for T cells) or CD3e-Fc (Creative BioMart; for tumor cells) protein. Bound recombinant protein was detected with an Fc antibody (GPC3-ENG MSC supernatant: filled curve; NT MSC supernatant: open curve).

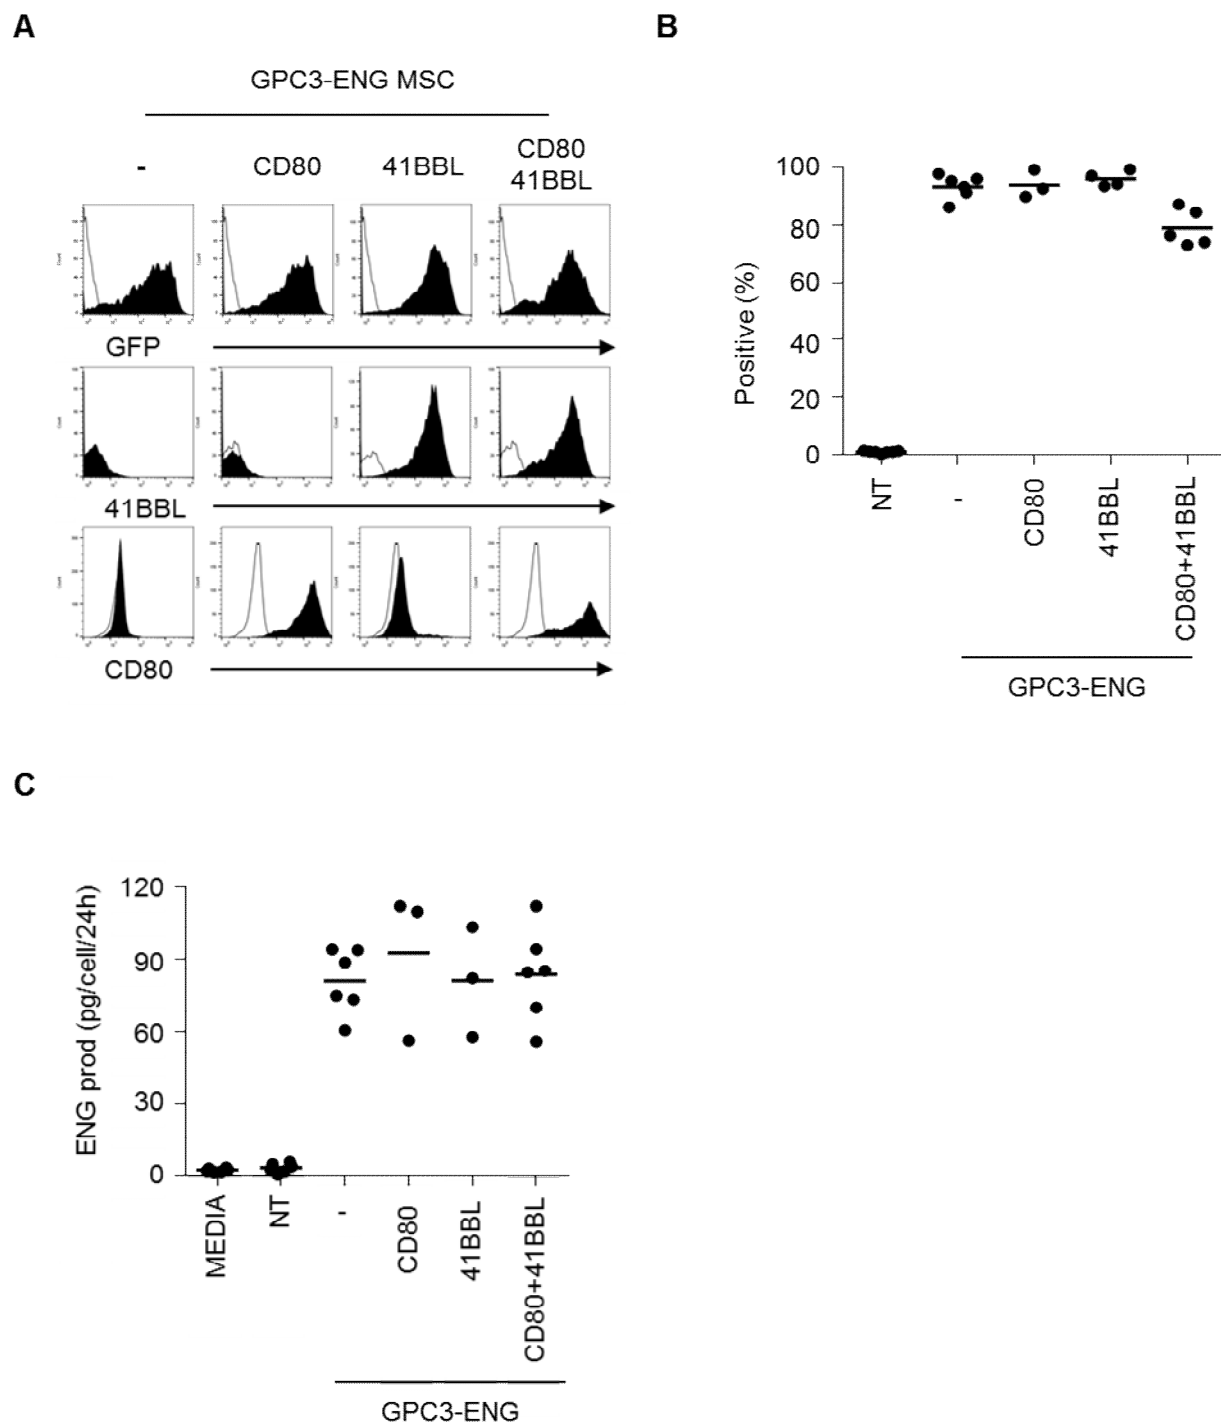

**Supplementary Figure 4: Generation of GPC3-ENG MSCs expressing CD80 and 41BBL costimulatory molecules.** (a,b) Representative FACS diagram and summary data. (c) Detection of GPC3-ENG protein in media of GPC3-ENG, GPC3-ENG.CD80, GPC3-ENG.41BBL and GPC3-ENG.CD80+41BBL MSCs after 24 hours of culture (GPC3-ENG.CD80, GPC3-ENG.41BBL MSCs (n=3); NT MSCs (n=4); GPC3-ENG, GPC3-ENG.CD80+41BBL MSCs (n=6; performed in duplicates).

**A**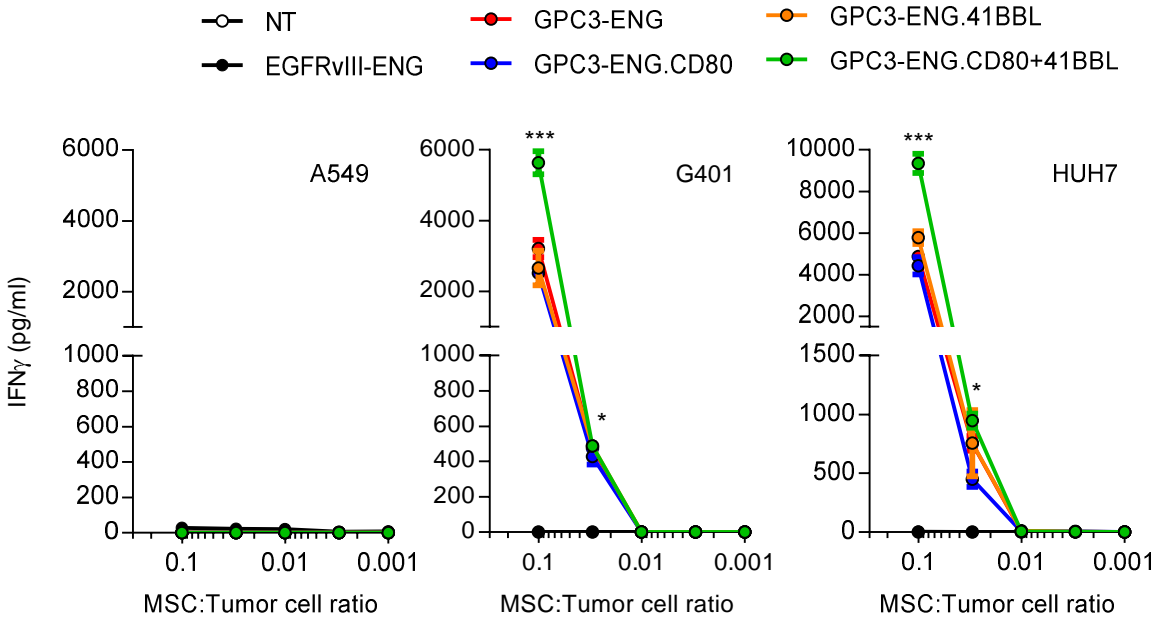**B**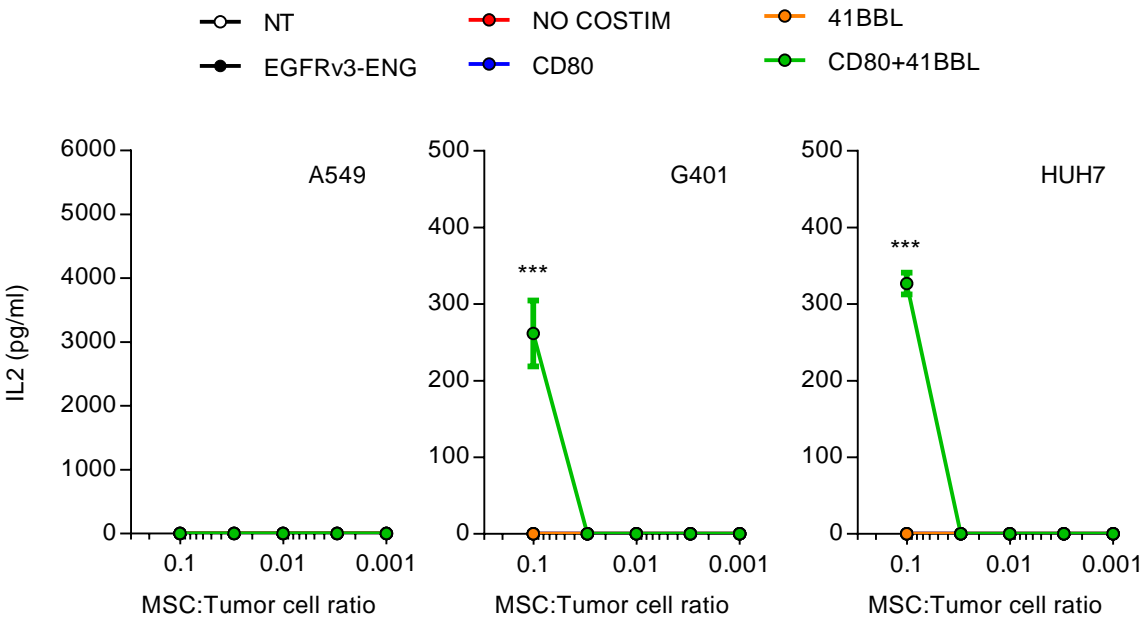

**Supplemental Figure 5: GPC3-ENG MSCs at a MSC to tumor cell ratio of 1:100 induce IFN $\gamma$  production.** GPC3-ENG, GPC3-ENG.CD80, GPC3-ENG.41BBL or GPC3-ENG.CD80+41BBL MSCs were cocultured with GPC3-positive (G401, HUH7) or -negative (A549) cell lines at a 1:10, 1:30, 1:100, 1:300, 1:1000 MSC to tumor cell ratio in the presence of human T cells (10:1 T-cell to tumor cell ratio). After 24 hours, IFN $\gamma$  (a) or IL-2 (b) was determined by ELISA (n = 2, assay performed in duplicates,  $p^* < 0.05$ ,  $***p < 0.001$ ).

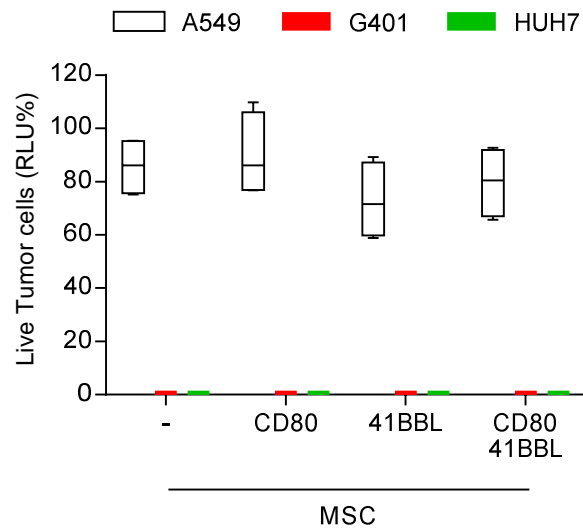

**Supplementary Figure 6: GPC3-ENG MSCs expressing CD80 and/or 41BBL eliminate GPC3+ target cells after 48 hours in coculture.** GPC3-ENG, GPC3-ENG.CD80, GPC3-ENG.41BBL or GPC3-ENG.CD80+41BBL MSCs were cocultured with GPC3-positive (G401.ffluc; HUH7.ffluc) or -negative (A549.ffluc) cell lines in 1:10 MSC to tumor cell ratios in the presence of human T cells (10:1 T-cell to tumor cell ratio). After 48 hours a luciferase-based cytotoxicity assay was performed (n=2; assay performed in duplicate).

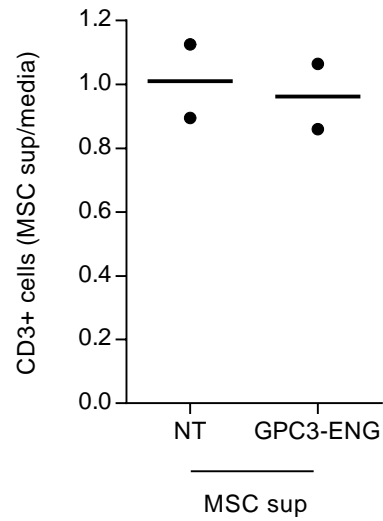

**Supplementary Figure 7: GPC3-ENG protein does not induce T cell proliferation in absence of GPC3-positive tumor cells.** T cells were incubated with supernatants from GPC3-ENG or NT MSCs, or media. After 72 hours absolute number of CD3-positive cells was determined by FACS analysis. Relative ratio of MSC sup/media is shown (n=2).



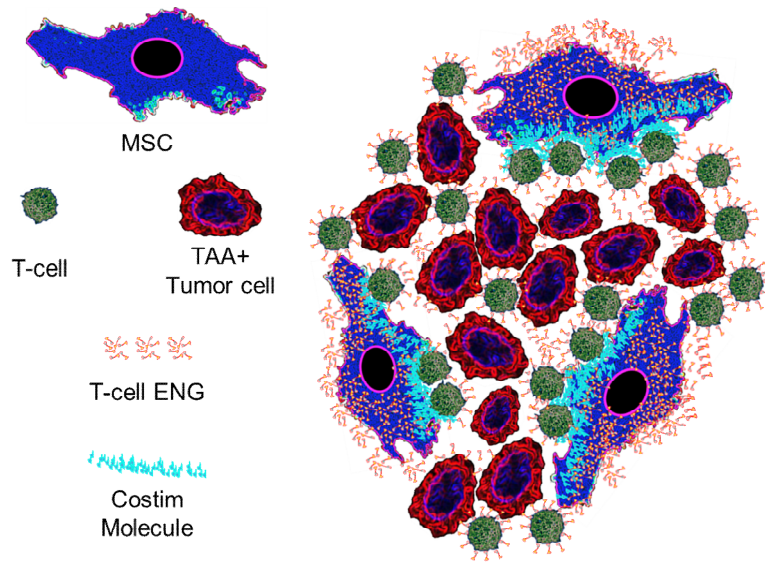

**Supplementary Figure 8: Schematic model of T-cell activating MSCs.** For details see text.

**A**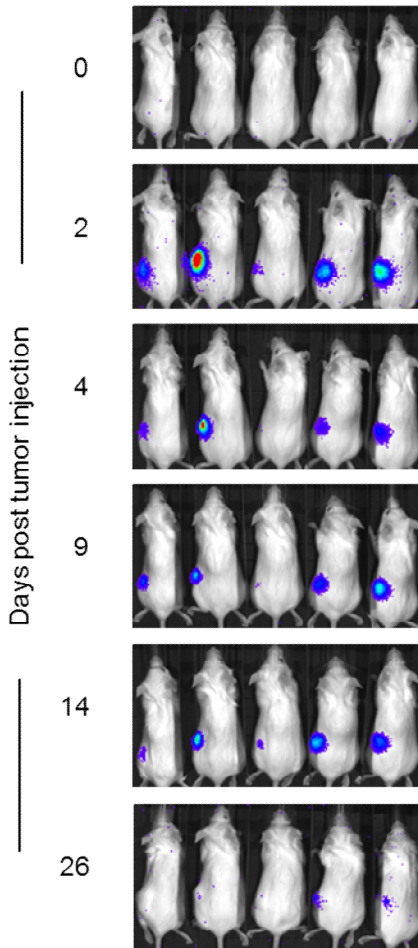**B**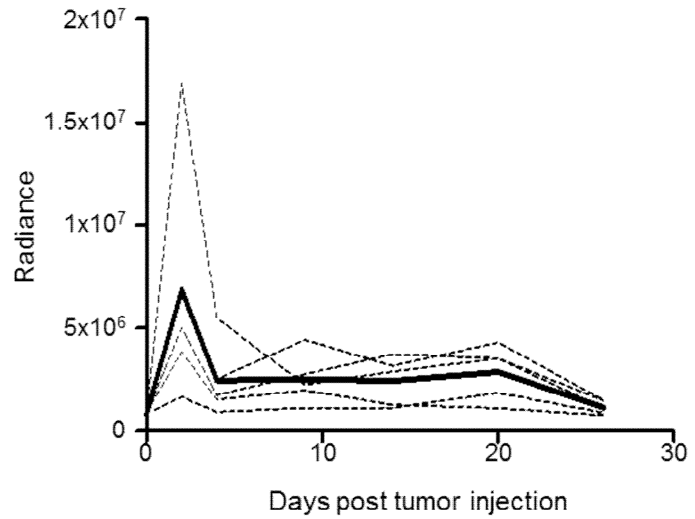

**Supplementary Figure 9: Persistence of GPC3-ENG MSCs after subcutaneous injection.** Mice were injected s.c. with  $5 \times 10^6$  HUH7 cells and  $5 \times 10^5$  GPC3-ENG.eGFP.ffLuc MSCs (n=5) on their left lower flank. MSC persistence was followed by bioluminescence imaging. (a) Representative images of animals. (b) Quantitative bioluminescence imaging results (solid lines: mean; dotted lines: individual mice; radiance=photons/sec/cm<sup>2</sup>/sr).

**A**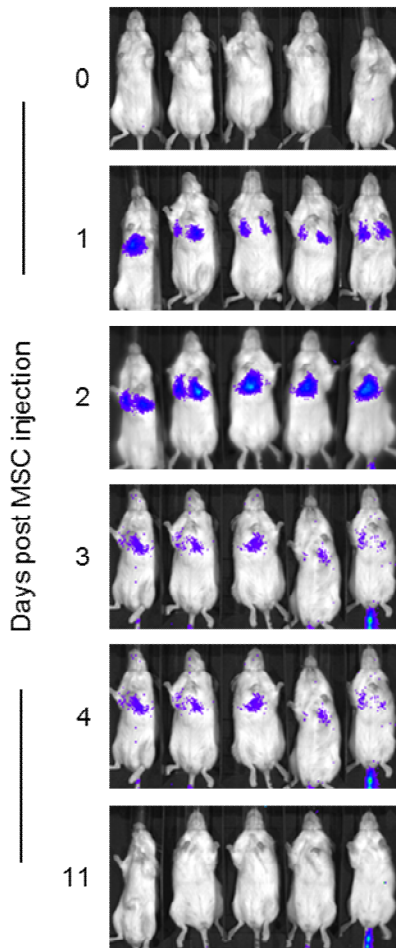**B**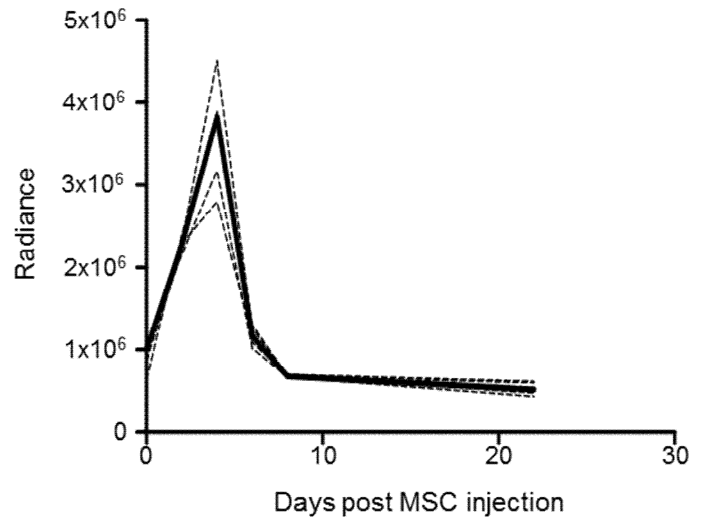

**Supplementary Figure 10: Persistence of GPC3-ENG MSCs after intravenous injection.** Mice were injected i.v. in their tail vein with  $5 \times 10^5$  GPC3-ENG.eGFP.ffLuc MSCs (n=5). MSC persistence was followed by bioluminescence imaging. (a) Representative images of animals. (b) Quantitative bioluminescence imaging results (solid lines: mean; dotted lines: individual mice; radiance=photons/sec/cm<sup>2</sup>/sr).
